# Supplementary material for: Ultrathin g-PAN/PANI-encapsulated Cu nanoparticles decorated on SrTiO3 with high stability as an efficient photocatalyst for the H2 evolution and degradation of 4-nitrophenol under visible-light irradiation
Source: Royal Society of Chemistry journal article supplement (doi:10.1039/d2cy00259k), 2022-01-01
Supplement: d2cy00259k1.pdf [file d2cy00259k1.pdf]

**Ultrathin g-PAN/PANI encapsulated Cu nanoparticles decorated on SrTiO<sub>3</sub> with high stability and as an efficient photocatalytic H<sub>2</sub> evolution and degradation of 4-nitrophenol**

Nan Sun,<sup>‡</sup> Yong Zhang,<sup>‡</sup> Xinru Li, Yuhan Jing, Zhengdong Zhang, Yu Gao, Jianqi Liu, Honglin Tan,\* Xiaoming Cai, Jinming Cai

Faculty of Materials Science and Engineering, Kunming University of Science and Technology, Kunming, Yunnan 650000, PR China

<sup>‡</sup> These authors contributed equally to this work.

\*Corresponding Authors: Dr. Honglin Tan, Faculty of Materials Science and Engineering, Kunming University of Science and Technology, Kunming, Yunnan 650000, PR China.

Email: [852419171@qq.com](mailto:852419171@qq.com)

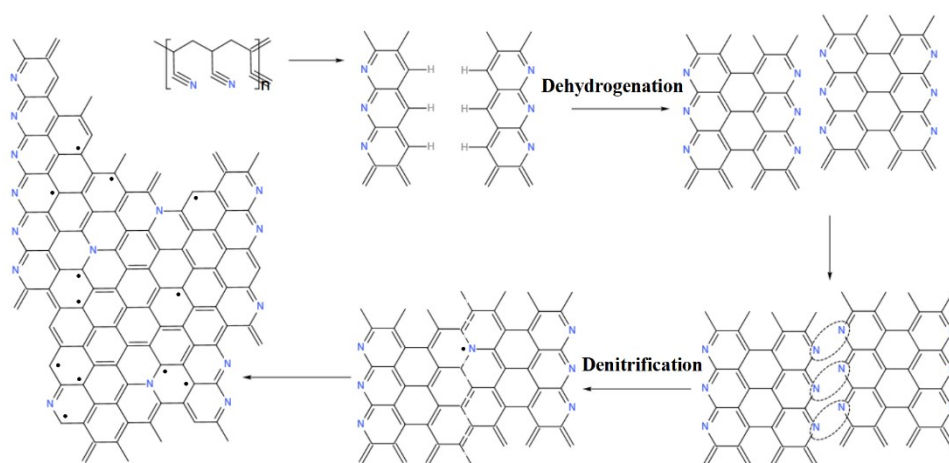

**Fig. S1** Structure and synthesis process of g-PAN.

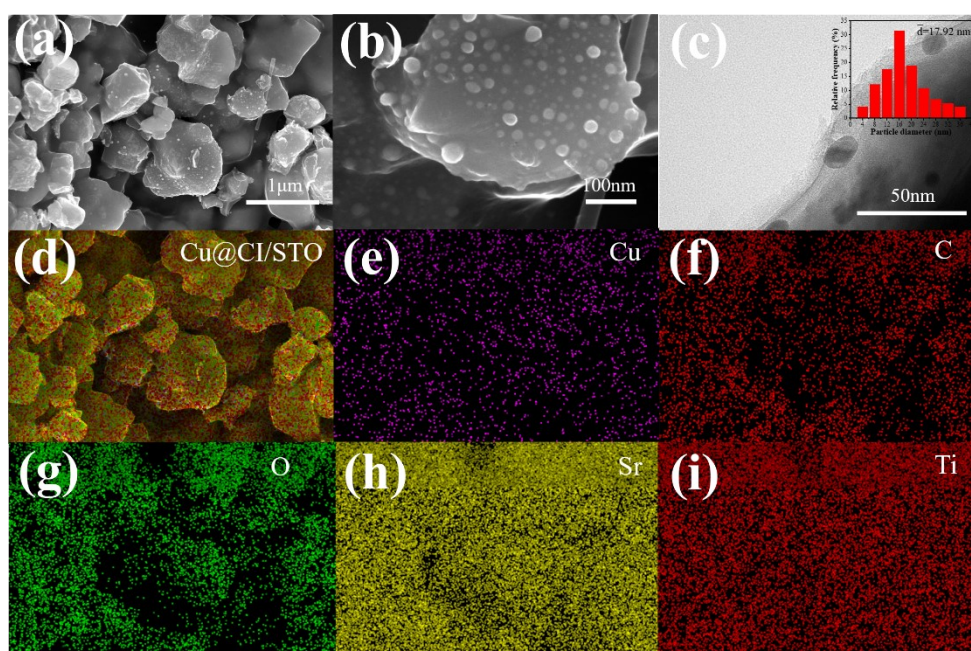

**Fig. S2** (a-b) SEM image (c) TEM of Cu@CI/STO-60ml (The illustration shows the Cu NPs particle size); (c-i) corresponding element distribution.

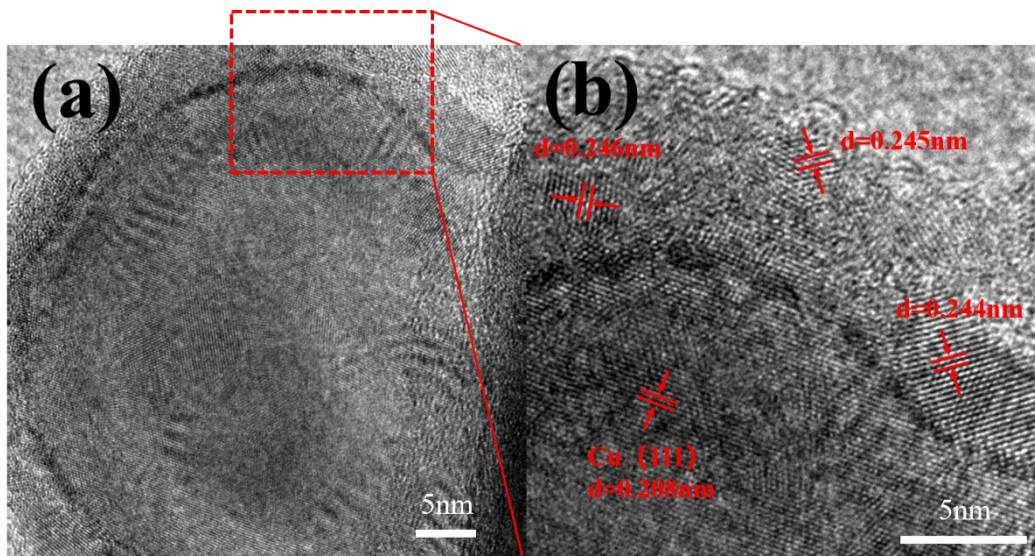

**Fig. S3** (a) TEM images of the Cu@CI/STO-10ml structure; (b) HRTEM images of the Cu@CI/STO-10ml structure.

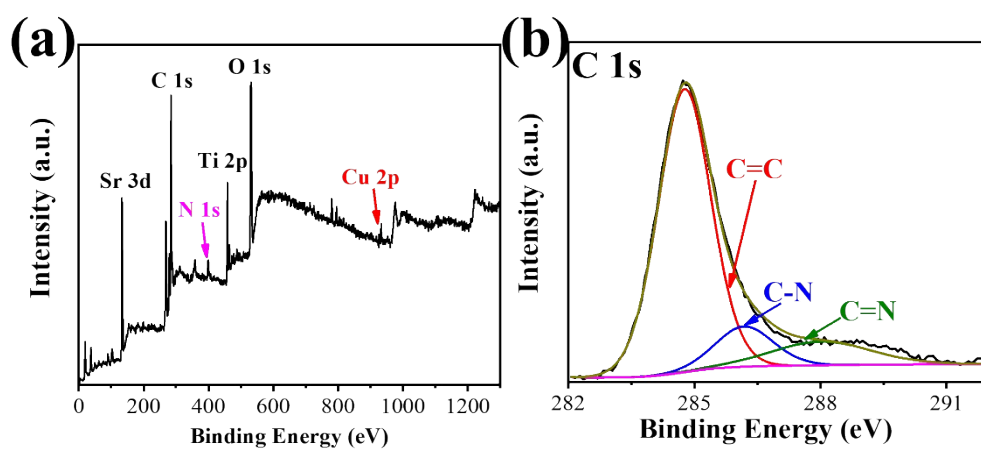

**Fig. S4** (a) Complete survey spectrum of the Cu@CI/STO, (b) XPS spectra of C 1s.

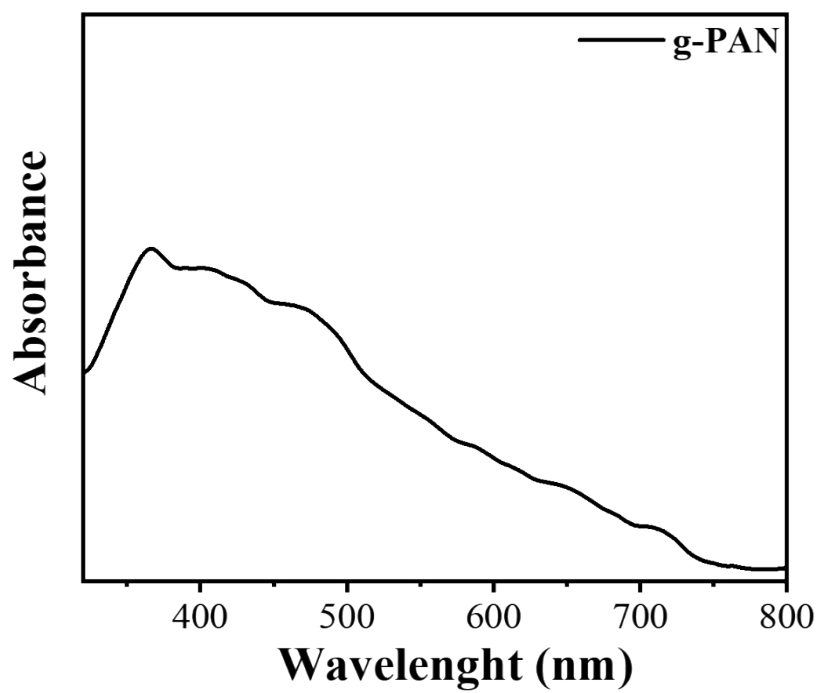

**Fig. S5** UV-Vis absorption spectra of g-PAN.

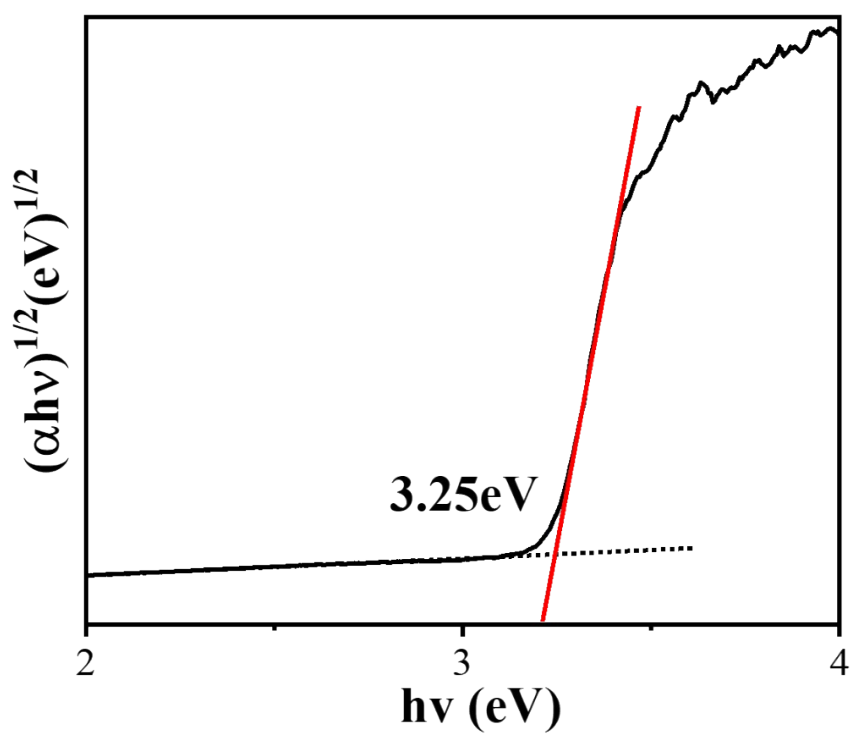

**Fig. S6** Tauc plot of SrTiO<sub>3</sub>.

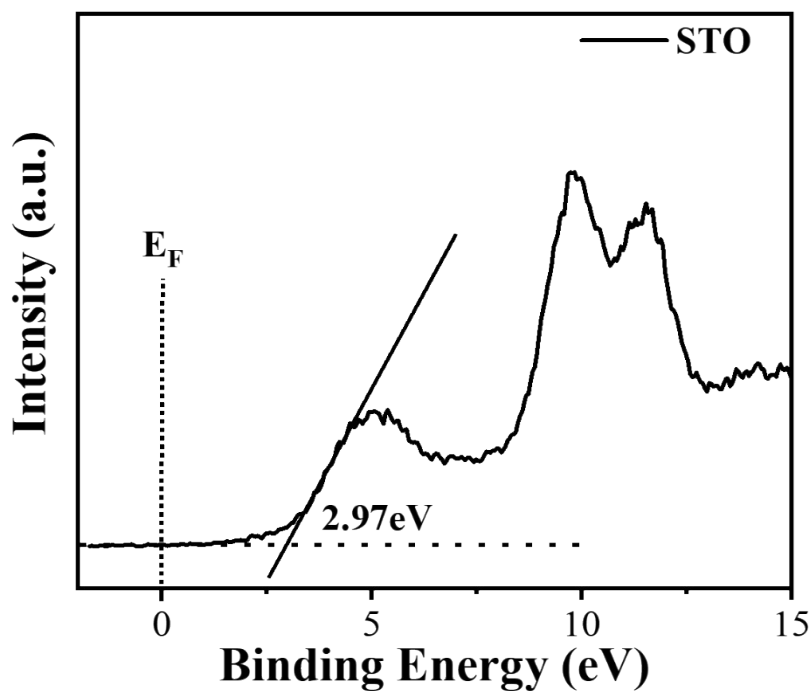

**Fig. S7** Tauc plot of Valence band XPS spectrum of SrTiO<sub>3</sub>.

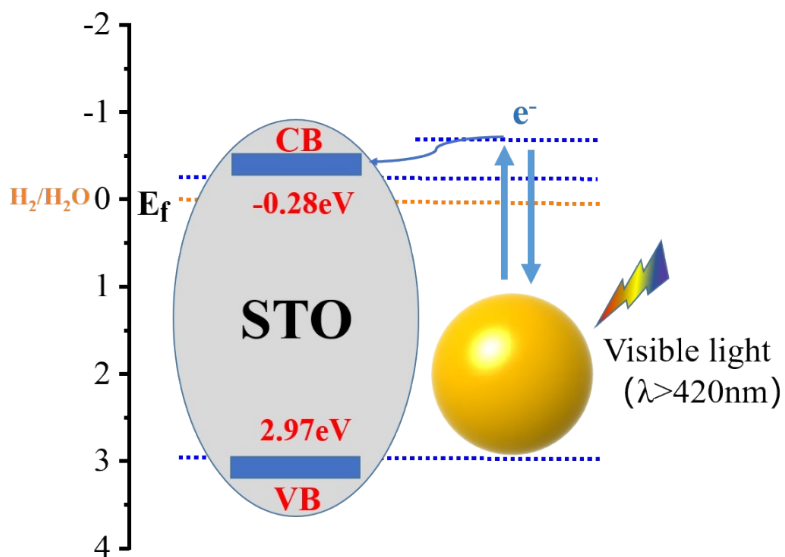

**Fig. S8** Schematic illustration of energy band position in Cu/SrTiO<sub>3</sub> composite nanostructure.

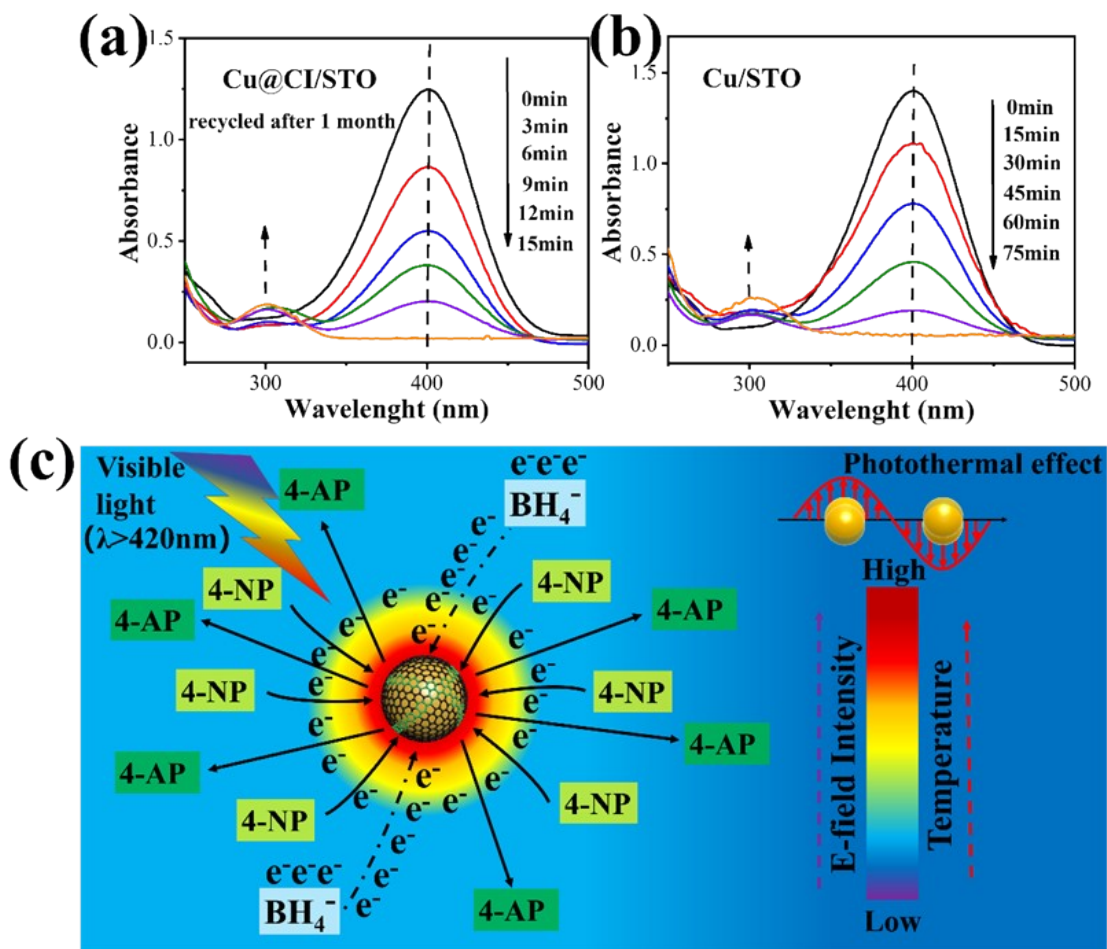

**Fig. S9** UV-vis absorbance spectra during the 4-nitrophenol reduction, in presence of (a) Cu@CI/STO, (b) Cu/STO. (c) Schematic diagram of the enhancement of 4-NP catalytic reduction on Cu@CI/STO by the thermal effect of SPR excitation when  $\text{NaBH}_4$  is used as the electron donor.



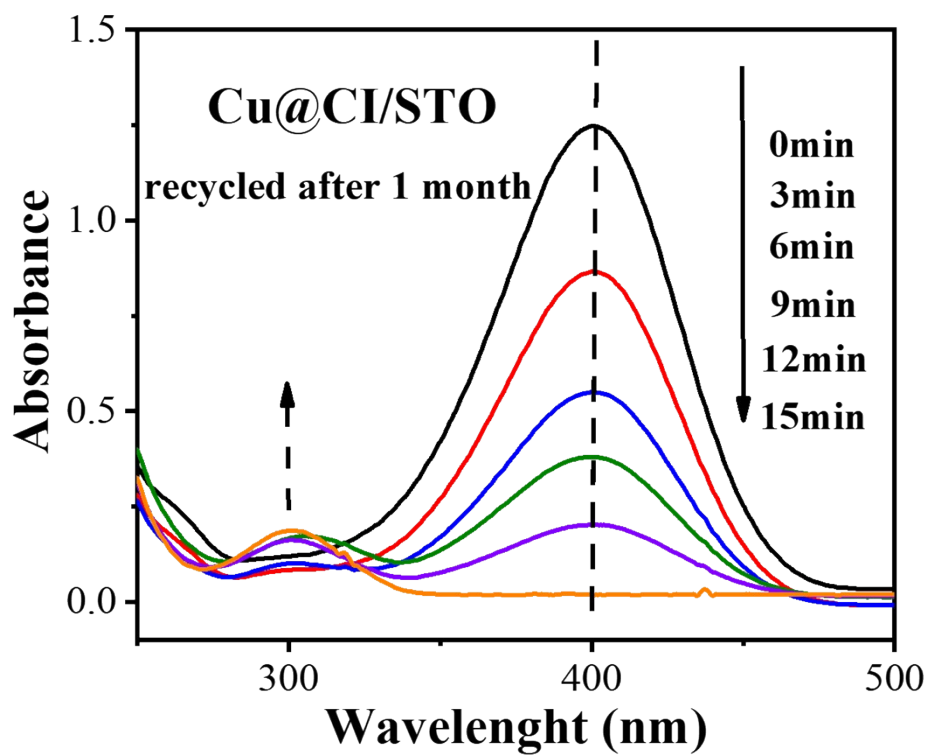

**Fig. 10** The UV-Vis absorption spectrum of 4-nitrophenol reduction in the presence of Cu@CI/STO after being placed in the air for 1 month.

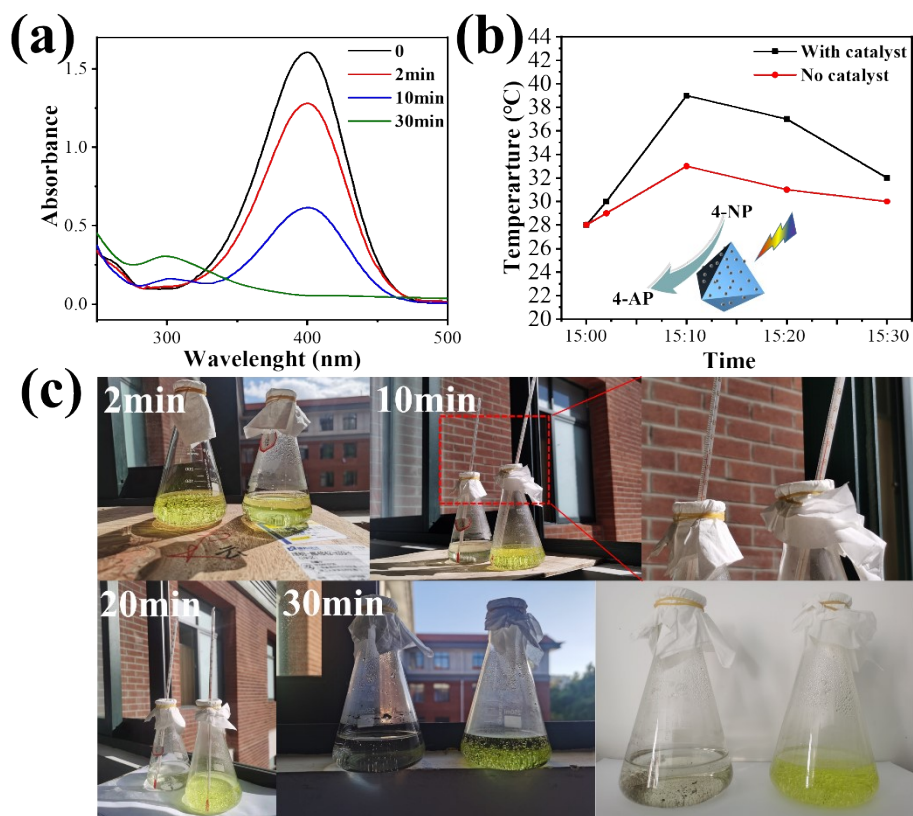

**Fig. 11** (a) UV–vis absorbance spectra during the 4-nitrophenol reduction in presence of Cu@CI/STO under sunlight; (b) with or without Cu@CI/STO temperature change with time at different times under sunlight; (c) the image is reflected at different times

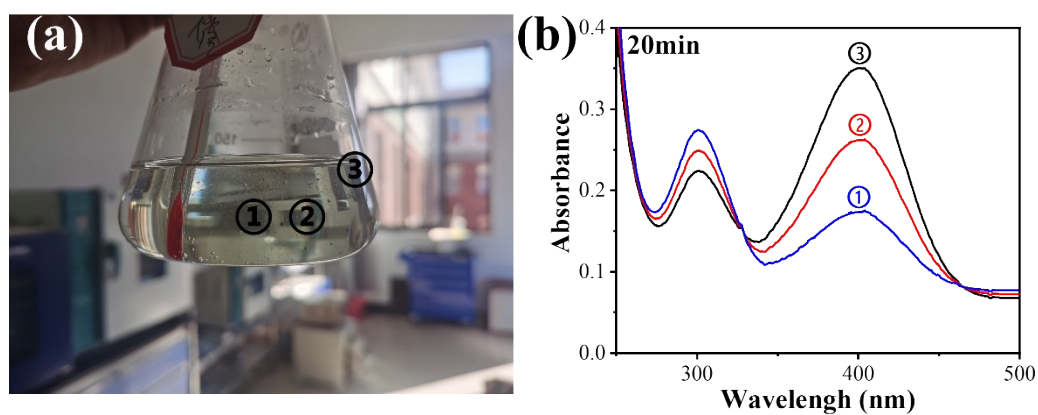

under sunlight.

**Fig. 12** Reaction for 20min at (a) different locations and (b)



corresponding UV-vis absorbance spectra.

**Table. S1** Different materials for metal-driven visible-light photocatalytic hydrogen evolution at present.

| <b>Samples</b>               | <b>Test condition</b>                         | <b>Hydrogen production reaction</b><br><b>(<math>\mu\text{mol}\cdot\text{g}^{-1}\cdot\text{h}^{-1}</math>)</b> | <b>Reference</b> |
|------------------------------|-----------------------------------------------|----------------------------------------------------------------------------------------------------------------|------------------|
| STO                          | 10% TEOA / 1% Pt / ( $\lambda > 420$ nm)      | 5.31                                                                                                           |                  |
| Au <sub>3</sub> Cu/STO       | 20% methanol/ 0.5% Pt / ( $\lambda > 400$ nm) | 76.3                                                                                                           | 1                |
| Au nanostar@TiO <sub>2</sub> | 20% methanol / ( $\lambda > 420$ nm)          | 76.6                                                                                                           | 2                |
| Cu@C/STO                     | 20% methanol/ 0.5% Pt / ( $\lambda > 400$ nm) | 255.3                                                                                                          | 3                |
| Cu@g-PAN/STO                 | 10% TEOA / 1% Pt / ( $\lambda > 420$ nm)      | 265.25                                                                                                         |                  |
| Cu@CI/STO                    | 10% TEOA / 1% Pt / ( $\lambda > 420$ nm)      | 371                                                                                                            | This work        |

## References

- 1 Xz A , Ao F B , Xin C A , et al. Catalysis Today. 2019, **335** 166-172.
- 2 B. Liu, Y. Jiang, Y. Wang, S. Shang, Y. Ni, N. Zhang, M. Cao, C. Hu, Catal.

Sci. Technol. 2018, **8** 1094-1103.

3 Ren L , Tong L , Yi X , et al. Chemical Engineering Journal. 2020, **390** 124558-.
